# Supplementary material for: Comparative Diagnostic Performance of a Novel Reverse Transcription Loop-Mediated Isothermal Amplification (RT-LAMP) Kit for the Rapid Detection of SARS-CoV-2
Source: Pathogens. 2021 Dec 15;10(12):1629. doi: 10.3390/pathogens10121629 (PMC8706056; doi:10.3390/pathogens10121629)
Supplement: Supplementary file 1 [file pathogens-10-01629-s001.zip › Dataset_S1.csv]

sample	sex	age	rtpcr	hg	ct_n_gene	hg_time	voc		Legend:
1	M	81	POS	POS	15	16.46	NA		rtpcr	RT-PCR diagnosis
2	F	32	POS	POS	15	10.2	NA		hg	HG COVID-19 RT-LAMP diagnosis
3	M	89	POS	POS	16	13.43	NA		ct_n_gene	RT-PCR cycle threshold value for the N gene
4	F	87	POS	POS	16	11.68	NA		hg_time	Time (min) to result on the HG COVID RT-LAMP assay
5	F	47	POS	POS	17	11.26	Alpha		voc	Variant of concern
6	F	53	POS	POS	17	17.86	Alpha		NA	Not available
7	F	38	POS	POS	17	15.6	NA		WT	Wild type (Wuhan-like)
8	M	92	POS	POS	17	11.62	NA
9	M	67	POS	POS	17	13.2	NA
10	F	65	POS	POS	17	13.86	NA
11	F	52	POS	POS	17	13.03	NA
12	M	44	POS	POS	17	15.83	NA
13	M	29	POS	POS	18	14.29	Alpha
14	M	30	POS	POS	18	14.38	Alpha
15	F	55	POS	POS	18	13.74	Alpha
16	F	92	POS	POS	18	12.96	NA
17	M	83	POS	POS	18	20.36	NA
18	M	27	POS	POS	18	12.63	NA
19	M	17	POS	POS	18	13.23	NA
20	M	66	POS	POS	18	13.01	NA
21	M	53	POS	POS	18	11.59	NA
22	M	56	POS	POS	18	13.24	NA
23	F	47	POS	POS	18	13.66	NA
24	M	45	POS	POS	18	11.71	NA
25	F	75	POS	POS	18	12.16	NA
26	F	74	POS	POS	18	12.27	NA
27	F	13	POS	POS	18	13.64	NA
28	F	22	POS	POS	18	15.4	NA
29	F	54	POS	POS	18	13.02	NA
30	F	76	POS	POS	18	12.52	NA
31	F	67	POS	POS	18	13.27	NA
32	M	1	POS	POS	19	15.23	NA
33	F	73	POS	POS	19	16.95	NA
34	F	60	POS	POS	19	16.23	Alpha
35	F	53	POS	POS	19	13.2	Alpha
36	F	50	POS	POS	19	16.78	Alpha
37	F	26	POS	POS	19	16.39	NA
38	F	46	POS	POS	19	13.67	Alpha
39	F	49	POS	POS	19	12.27	Alpha
40	M	47	POS	POS	19	12.68	Alpha
41	F	45	POS	POS	19	12.15	Alpha
42	F	23	POS	POS	19	12.5	Alpha
43	F	48	POS	POS	19	13.85	NA
44	M	45	POS	POS	19	14.53	NA
45	F	21	POS	POS	19	12.81	NA
46	M	57	POS	POS	19	13.7	NA
47	M	46	POS	POS	19	13.49	NA
48	M	15	POS	POS	19	16.79	NA
49	F	67	POS	POS	19	14.46	NA
50	F	31	POS	POS	19	14.44	NA
51	F	36	POS	POS	20	15.91	Alpha
52	M	61	POS	POS	20	14.48	Alpha
53	F	50	POS	POS	20	14.8	Alpha
54	M	42	POS	POS	20	15.11	Alpha
55	M	13	POS	POS	20	12.94	Alpha
56	M	65	POS	POS	20	15.49	Alpha
57	M	71	POS	POS	20	17.71	Alpha
58	F	9	POS	POS	20	15.24	Alpha
59	M	44	POS	POS	20	18.2	Alpha
60	M	72	POS	POS	20	12.56	Alpha
61	F	41	POS	POS	20	12.33	Alpha
62	F	77	POS	POS	20	15.29	Alpha
63	F	55	POS	POS	20	14.1	Alpha
64	M	23	POS	POS	20	14.75	NA
65	M	48	POS	POS	20	13.98	NA
66	M	54	POS	POS	21	16.18	Alpha
67	M	44	POS	POS	21	15.4	Alpha
68	M	45	POS	POS	21	14.57	Alpha
69	M	69	POS	POS	21	17.19	Alpha
70	M	14	POS	POS	21	17.23	Alpha
71	F	33	POS	POS	21	16.95	Alpha
72	F	38	POS	POS	21	14.82	NA
73	F	88	POS	POS	22	15.58	Alpha
74	F	49	POS	POS	22	21.09	Alpha
75	M	32	POS	POS	22	13.42	NA
76	M	52	POS	POS	22	12.93	Alpha
77	F	88	POS	POS	22	16.57	Alpha
78	M	58	POS	POS	22	14.62	Alpha
79	F	49	POS	POS	22	16.04	Alpha
80	F	24	POS	POS	22	14.81	Alpha
81	F	23	POS	POS	22	14.29	Alpha
82	F	59	POS	POS	22	17.84	Alpha
83	M	56	POS	POS	22	15.89	NA
84	M	62	POS	POS	23	17.51	Alpha
85	M	85	POS	POS	23	13.02	Alpha
86	M	56	POS	POS	23	22.36	Alpha
87	M	50	POS	POS	23	14.31	Alpha
88	F	42	POS	POS	23	15.12	Alpha
89	F	46	POS	POS	23	14.54	Alpha
90	F	22	POS	POS	23	15.74	Alpha
91	M	71	POS	POS	23	15.6	NA
92	M	83	POS	POS	24	16.94	Alpha
93	F	4	POS	POS	24	16.31	Alpha
94	M	67	POS	POS	24	17.92	Alpha
95	F	32	POS	POS	24	17.18	Alpha
96	M	46	POS	POS	24	15.66	Alpha
97	M	15	POS	POS	24	17.24	Alpha
98	F	14	POS	POS	24	15.82	NA
99	M	13	POS	POS	24	15.86	NA
100	M	38	POS	POS	24	15.75	NA
101	F	33	POS	POS	25	16.26	Alpha
102	F	77	POS	POS	25	14.76	WT
103	M	35	POS	POS	25	17.48	Alpha
104	M	49	POS	POS	25	15.22	Alpha
105	F	64	POS	POS	25	14.18	Alpha
106	F	77	POS	POS	25	18.87	Alpha
107	M	71	POS	POS	25	18.29	NA
108	F	52	POS	POS	25	16.9	NA
109	M	50	POS	POS	25	17.27	NA
110	F	68	POS	POS	25	13.65	NA
111	M	25	POS	POS	25	17.72	NA
112	M	10	POS	POS	26	16.22	Alpha
113	M	30	POS	POS	26	17.11	NA
114	M	71	POS	POS	26	16.8	NA
115	F	64	POS	POS	26	17.18	NA
116	F	32	POS	POS	26	16.01	NA
117	M	50	POS	POS	26	18.28	NA
118	F	48	POS	POS	26	17.66	NA
119	F	47	POS	POS	26	18.18	NA
120	M	88	POS	POS	27	14.85	Alpha
121	M	44	POS	POS	27	13.76	Alpha
122	M	81	POS	POS	27	15.24	NA
123	M	10	POS	POS	27	18.21	NA
124	F	57	POS	POS	27	16.92	NA
125	F	68	POS	POS	27	16.65	NA
126	M	55	POS	POS	27	16.49	NA
127	M	5	POS	POS	27	16.89	NA
128	F	47	POS	POS	27	17.07	NA
129	F	49	POS	POS	27	17.35	NA
130	F	59	POS	POS	27	18.81	NA
131	M	56	POS	POS	27	18.25	NA
132	F	39	POS	POS	27	19.28	NA
133	F	92	POS	POS	28	22.41	Alpha
134	F	53	POS	POS	28	18.18	NA
135	F	86	POS	POS	28	20.23	NA
136	F	55	POS	POS	29	19.81	NA
137	M	30	POS	POS	29	18.3	NA
138	F	44	POS	POS	29	19.35	NA
139	F	20	POS	POS	29	20.18	NA
140	M	1	POS	POS	29	18.22	NA
141	F	12	POS	POS	29	19.01	NA
142	F	68	POS	POS	29	19.04	NA
143	F	85	POS	POS	29	19.08	NA
144	M	25	POS	POS	29	18.14	NA
145	M	53	POS	POS	29	18.35	NA
146	M	41	POS	POS	29	17.07	NA
147	M	15	POS	POS	29	19.77	NA
148	M	69	POS	POS	29	18.53	NA
149	F	15	POS	POS	29	18.28	NA
150	F	53	POS	POS	29	17.05	NA
151	F	51	POS	POS	30	22.38	NA
152	F	80	POS	POS	30	22.35	NA
153	M	56	POS	POS	30	20.4	NA
154	F	57	POS	POS	30	19.4	NA
155	M	52	POS	POS	30	20.13	NA
156	M	65	POS	POS	30	19.24	NA
157	F	47	POS	POS	30	18.89	NA
158	M	46	POS	POS	30	18.17	NA
159	F	44	POS	POS	31	24.41	NA
160	F	75	POS	POS	31	21.6	NA
161	M	56	POS	POS	31	27.2	NA
162	M	35	POS	POS	31	18.24	NA
163	F	31	POS	POS	31	20.62	NA
164	F	78	POS	POS	31	19.1	NA
165	F	26	POS	POS	31	17.29	NA
166	M	56	POS	POS	31	21.49	NA
167	F	54	POS	POS	31	26.5	NA
168	M	49	POS	POS	31	26.24	NA
169	M	26	POS	POS	32	22.89	NA
170	M	59	POS	POS	32	24.02	NA
171	M	45	POS	POS	32	21.65	NA
172	F	77	POS	POS	32	18.19	NA
173	F	41	POS	POS	32	19.2	NA
174	M	51	POS	POS	32	21.51	NA
175	M	73	POS	POS	32	20.35	NA
176	M	45	POS	POS	32	21.4	NA
177	M	52	POS	POS	32	20.43	NA
178	F	107	POS	POS	33	22.4	NA
179	M	24	POS	POS	33	20.62	NA
180	F	19	POS	POS	33	19.84	NA
181	M	54	POS	POS	33	21.21	NA
182	M	24	POS	POS	33	21.82	NA
183	M	67	POS	POS	33	23.72	NA
184	M	77	POS	POS	34	26.92	NA
185	F	9	POS	POS	34	20.51	NA
186	F	77	POS	POS	34	21.09	NA
187	F	38	POS	POS	34	22.85	NA
188	M	57	POS	POS	35	19.14	NA
189	F	41	POS	POS	35	23.26	NA
190	M	85	POS	POS	35	26.32	NA
191	M	62	POS	POS	36	22.06	NA
192	F	17	POS	POS	37	21.91	NA
193	F	56	POS	POS	37	20.64	NA
194	F	59	POS	POS	39	21.28	NA
195	F	74	POS	NEG	31	NA	NA
196	M	81	POS	NEG	33	NA	NA
197	M	61	POS	NEG	33	NA	NA
198	M	21	POS	NEG	34	NA	NA
199	M	69	POS	NEG	35	NA	NA
200	M	54	POS	NEG	38	NA	NA
201	F	86	NEG	NEG	NA	NA	NA
202	F	69	NEG	NEG	NA	NA	NA
203	F	84	NEG	NEG	NA	NA	NA
204	F	39	NEG	NEG	NA	NA	NA
205	F	81	NEG	NEG	NA	NA	NA
206	M	43	NEG	NEG	NA	NA	NA
207	F	71	NEG	NEG	NA	NA	NA
208	M	86	NEG	NEG	NA	NA	NA
209	M	84	NEG	NEG	NA	NA	NA
210	F	66	NEG	NEG	NA	NA	NA
211	F	78	NEG	NEG	NA	NA	NA
212	M	54	NEG	NEG	NA	NA	NA
213	M	76	NEG	NEG	NA	NA	NA
214	M	73	NEG	NEG	NA	NA	NA
215	F	76	NEG	NEG	NA	NA	NA
216	F	70	NEG	NEG	NA	NA	NA
217	F	56	NEG	NEG	NA	NA	NA
218	F	31	NEG	NEG	NA	NA	NA
219	M	49	NEG	NEG	NA	NA	NA
220	M	44	NEG	NEG	NA	NA	NA
221	F	60	NEG	NEG	NA	NA	NA
222	F	56	NEG	NEG	NA	NA	NA
223	F	63	NEG	NEG	NA	NA	NA
224	F	77	NEG	NEG	NA	NA	NA
225	F	51	NEG	NEG	NA	NA	NA
226	F	54	NEG	NEG	NA	NA	NA
227	F	18	NEG	NEG	NA	NA	NA
228	F	58	NEG	NEG	NA	NA	NA
229	F	29	NEG	NEG	NA	NA	NA
230	M	9	NEG	NEG	NA	NA	NA
231	F	51	NEG	NEG	NA	NA	NA
232	M	36	NEG	NEG	NA	NA	NA
233	M	62	NEG	NEG	NA	NA	NA
234	F	21	NEG	NEG	NA	NA	NA
235	F	48	NEG	NEG	NA	NA	NA
236	M	79	NEG	NEG	NA	NA	NA
237	M	85	NEG	NEG	NA	NA	NA
238	M	81	NEG	NEG	NA	NA	NA
239	F	71	NEG	NEG	NA	NA	NA
240	F	59	NEG	NEG	NA	NA	NA
241	M	51	NEG	NEG	NA	NA	NA
242	F	18	NEG	NEG	NA	NA	NA
243	M	21	NEG	NEG	NA	NA	NA
244	M	60	NEG	NEG	NA	NA	NA
245	F	60	NEG	NEG	NA	NA	NA
246	F	58	NEG	NEG	NA	NA	NA
247	F	86	NEG	NEG	NA	NA	NA
248	M	45	NEG	NEG	NA	NA	NA
249	M	69	NEG	NEG	NA	NA	NA
250	F	77	NEG	NEG	NA	NA	NA
251	F	57	NEG	NEG	NA	NA	NA
252	M	76	NEG	NEG	NA	NA	NA
253	F	51	NEG	NEG	NA	NA	NA
254	M	90	NEG	NEG	NA	NA	NA
255	F	90	NEG	NEG	NA	NA	NA
256	M	78	NEG	NEG	NA	NA	NA
257	F	90	NEG	NEG	NA	NA	NA
258	M	23	NEG	NEG	NA	NA	NA
259	M	81	NEG	NEG	NA	NA	NA
260	F	74	NEG	NEG	NA	NA	NA
261	M	82	NEG	NEG	NA	NA	NA
262	F	84	NEG	NEG	NA	NA	NA
263	F	78	NEG	NEG	NA	NA	NA
264	F	62	NEG	NEG	NA	NA	NA
265	M	24	NEG	NEG	NA	NA	NA
266	F	78	NEG	NEG	NA	NA	NA
267	M	37	NEG	NEG	NA	NA	NA
268	F	45	NEG	NEG	NA	NA	NA
269	M	40	NEG	NEG	NA	NA	NA
270	M	41	NEG	NEG	NA	NA	NA
271	M	53	NEG	NEG	NA	NA	NA
272	F	53	NEG	NEG	NA	NA	NA
273	F	16	NEG	NEG	NA	NA	NA
274	M	56	NEG	NEG	NA	NA	NA
275	F	53	NEG	NEG	NA	NA	NA
276	F	48	NEG	NEG	NA	NA	NA
277	M	87	NEG	NEG	NA	NA	NA
278	F	72	NEG	NEG	NA	NA	NA
279	M	80	NEG	NEG	NA	NA	NA
280	M	20	NEG	NEG	NA	NA	NA
281	M	67	NEG	NEG	NA	NA	NA
282	F	82	NEG	NEG	NA	NA	NA
283	M	80	NEG	NEG	NA	NA	NA
284	F	83	NEG	NEG	NA	NA	NA
285	F	94	NEG	NEG	NA	NA	NA
286	M	66	NEG	NEG	NA	NA	NA
287	M	87	NEG	NEG	NA	NA	NA
288	M	82	NEG	NEG	NA	NA	NA
289	M	89	NEG	NEG	NA	NA	NA
290	F	81	NEG	NEG	NA	NA	NA
291	F	91	NEG	NEG	NA	NA	NA
292	F	76	NEG	NEG	NA	NA	NA
293	F	79	NEG	NEG	NA	NA	NA
294	F	82	NEG	NEG	NA	NA	NA
295	M	93	NEG	NEG	NA	NA	NA
296	M	85	NEG	NEG	NA	NA	NA
297	F	46	NEG	NEG	NA	NA	NA
298	F	59	NEG	NEG	NA	NA	NA
299	F	69	NEG	NEG	NA	NA	NA
300	F	52	NEG	NEG	NA	NA	NA
301	M	23	NEG	NEG	NA	NA	NA
302	M	28	NEG	NEG	NA	NA	NA
303	F	29	NEG	NEG	NA	NA	NA
304	F	27	NEG	NEG	NA	NA	NA
305	F	24	NEG	NEG	NA	NA	NA
306	M	33	NEG	NEG	NA	NA	NA
307	M	41	NEG	NEG	NA	NA	NA
308	F	28	NEG	NEG	NA	NA	NA
309	F	40	NEG	NEG	NA	NA	NA
310	F	29	NEG	NEG	NA	NA	NA
311	M	25	NEG	NEG	NA	NA	NA
312	F	24	NEG	NEG	NA	NA	NA
313	F	30	NEG	NEG	NA	NA	NA
314	M	21	NEG	NEG	NA	NA	NA
315	F	37	NEG	NEG	NA	NA	NA
316	F	25	NEG	NEG	NA	NA	NA
317	M	39	NEG	NEG	NA	NA	NA
318	F	25	NEG	NEG	NA	NA	NA
319	M	35	NEG	NEG	NA	NA	NA
320	F	34	NEG	NEG	NA	NA	NA
321	F	33	NEG	NEG	NA	NA	NA
322	F	31	NEG	NEG	NA	NA	NA
323	F	32	NEG	NEG	NA	NA	NA
324	F	36	NEG	NEG	NA	NA	NA
325	F	32	NEG	NEG	NA	NA	NA
326	M	33	NEG	NEG	NA	NA	NA
327	F	33	NEG	NEG	NA	NA	NA
328	M	37	NEG	NEG	NA	NA	NA
329	M	61	NEG	NEG	NA	NA	NA
330	F	38	NEG	NEG	NA	NA	NA
331	F	35	NEG	NEG	NA	NA	NA
332	M	36	NEG	NEG	NA	NA	NA
333	F	34	NEG	NEG	NA	NA	NA
334	M	34	NEG	NEG	NA	NA	NA
335	M	33	NEG	NEG	NA	NA	NA
336	F	25	NEG	NEG	NA	NA	NA
337	F	31	NEG	NEG	NA	NA	NA
338	F	29	NEG	NEG	NA	NA	NA
339	F	43	NEG	NEG	NA	NA	NA
340	M	29	NEG	NEG	NA	NA	NA
341	F	47	NEG	NEG	NA	NA	NA
342	F	33	NEG	NEG	NA	NA	NA
343	M	35	NEG	NEG	NA	NA	NA
344	M	38	NEG	NEG	NA	NA	NA
345	F	19	NEG	NEG	NA	NA	NA
346	M	24	NEG	NEG	NA	NA	NA
347	M	31	NEG	NEG	NA	NA	NA
348	F	47	NEG	NEG	NA	NA	NA
349	F	36	NEG	NEG	NA	NA	NA
350	F	36	NEG	NEG	NA	NA	NA
351	F	27	NEG	NEG	NA	NA	NA
352	F	43	NEG	NEG	NA	NA	NA
353	F	43	NEG	NEG	NA	NA	NA
354	F	47	NEG	NEG	NA	NA	NA
355	M	32	NEG	NEG	NA	NA	NA
356	F	41	NEG	NEG	NA	NA	NA
357	F	47	NEG	NEG	NA	NA	NA
358	M	4	NEG	NEG	NA	NA	NA
359	M	15	NEG	NEG	NA	NA	NA
360	M	27	NEG	NEG	NA	NA	NA
361	M	49	NEG	NEG	NA	NA	NA
362	M	18	NEG	NEG	NA	NA	NA
363	M	62	NEG	NEG	NA	NA	NA
364	M	42	NEG	NEG	NA	NA	NA
365	M	48	NEG	NEG	NA	NA	NA
366	M	65	NEG	NEG	NA	NA	NA
367	M	46	NEG	NEG	NA	NA	NA
368	M	65	NEG	NEG	NA	NA	NA
369	M	55	NEG	NEG	NA	NA	NA
370	M	59	NEG	NEG	NA	NA	NA
371	M	48	NEG	NEG	NA	NA	NA
372	M	51	NEG	NEG	NA	NA	NA
373	F	21	NEG	NEG	NA	NA	NA
374	F	55	NEG	NEG	NA	NA	NA
375	M	55	NEG	NEG	NA	NA	NA
376	M	22	NEG	NEG	NA	NA	NA
377	F	29	NEG	NEG	NA	NA	NA
378	F	37	NEG	NEG	NA	NA	NA
379	M	49	NEG	NEG	NA	NA	NA
380	M	46	NEG	NEG	NA	NA	NA
381	M	64	NEG	NEG	NA	NA	NA
382	F	32	NEG	NEG	NA	NA	NA
383	M	67	NEG	NEG	NA	NA	NA
384	M	38	NEG	NEG	NA	NA	NA
385	F	19	NEG	NEG	NA	NA	NA
386	M	69	NEG	NEG	NA	NA	NA
387	M	18	NEG	NEG	NA	NA	NA
388	F	39	NEG	NEG	NA	NA	NA
389	F	42	NEG	NEG	NA	NA	NA
390	M	51	NEG	NEG	NA	NA	NA
391	F	88	NEG	NEG	NA	NA	NA
392	M	33	NEG	NEG	NA	NA	NA
393	F	75	NEG	NEG	NA	NA	NA
394	M	61	NEG	NEG	NA	NA	NA
395	F	49	NEG	NEG	NA	NA	NA
396	F	57	NEG	NEG	NA	NA	NA
397	M	45	NEG	NEG	NA	NA	NA
398	F	72	NEG	POS	NA	23.92	NA
399	F	71	NEG	POS	NA	26.08	NA
400	F	35	NEG	POS	NA	21.49	NA
