# Supplementary figures and images for: Comparative Diagnostic Performance of a Novel Reverse Transcription Loop-Mediated Isothermal Amplification (RT-LAMP) Kit for the Rapid Detection of SARS-CoV-2
Source: MDPI journal article supplement (doi:10.3390/pathogens10121629), 2021-12-15

**Figure S1.** STARD (Standards for Reporting of Diagnostic Accuracy Studies) flowchart.

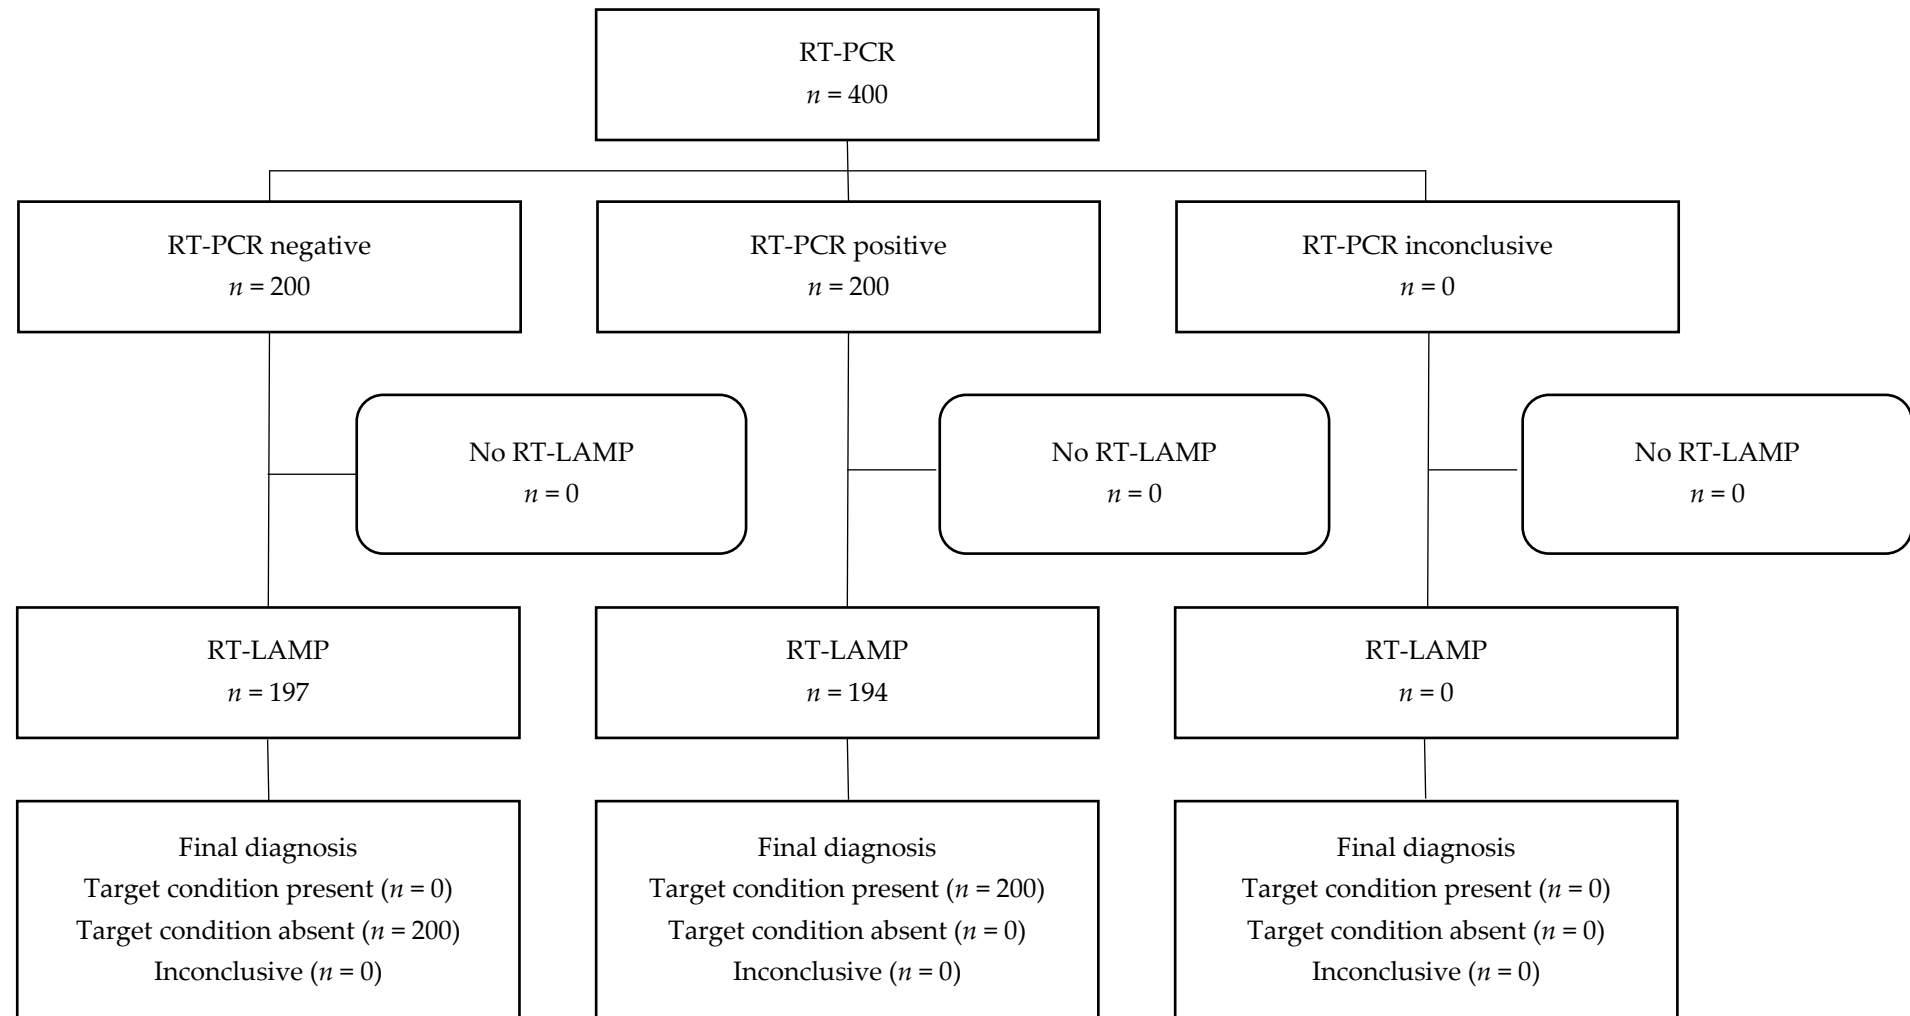

Supplement: s1 [file s1]
